# Supplementary material for: The effect of crystallinity on photocatalytic performance of Co3O4 water-splitting cocatalysts
Source: Royal Society of Chemistry journal article supplement (doi:10.1039/c5cp07589k), 2016-01-01
Supplement: c5cp07589k1.pdf [file c5cp07589k1.pdf]

## Electronic Supplementary Information

### **Effect of crystallinity on photocatalytic performance of $\text{Co}_3\text{O}_4$ water-splitting cocatalyst**

Chin Sheng Chua,<sup>a</sup> Davide Ansovini,<sup>a,b</sup> Coryl Jing Jun Lee,<sup>a</sup> Yin Ting Teng,<sup>d</sup> Lay Ting Ong,<sup>a</sup>

Dongzhi Chi,<sup>a</sup> T. S. Andy Hor,<sup>a,c</sup> Robert Raja,<sup>b</sup> and Yee-Fun Lim,<sup>a\*</sup>

<sup>a</sup> Institute of Materials Research and Engineering (IMRE), A\*STAR (Agency for Science, Technology and Research), 3 Research Link, Singapore 117602, Republic of Singapore.

<sup>b</sup> School of Chemistry, University of Southampton, Highfield, Southampton SO17 1BJ, United Kingdom.

<sup>c</sup> Department of Chemistry, National University of Singapore, 3 Science Drive 3, Singapore 117543, Singapore

<sup>d</sup> Energy Research Institute @NTU (ERI@N), Research Techno Plaza, X-Frontier Block, Level 5, 50 Nanyang Drive, Singapore 637553, Singapore

Email: [limyf@imre.a-star.edu.sg](mailto:limyf@imre.a-star.edu.sg)

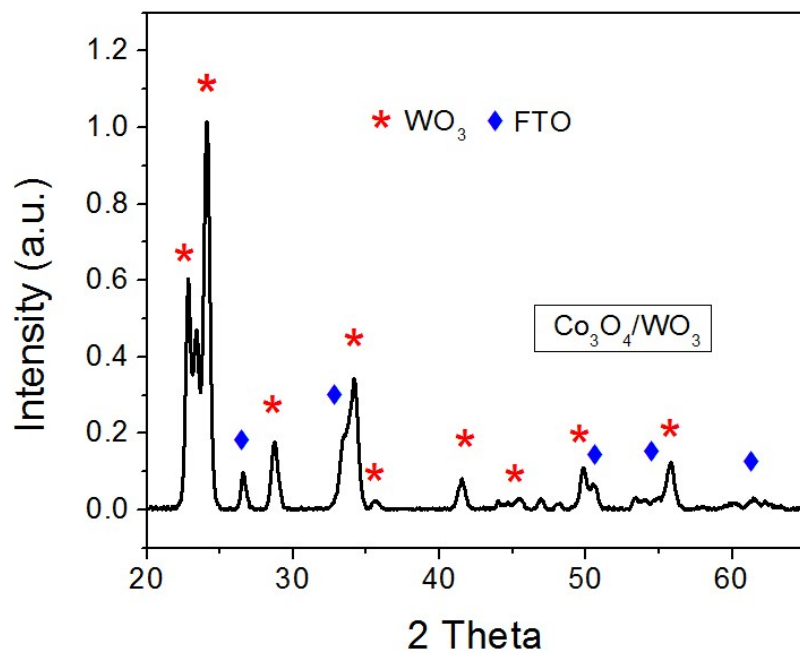

**Figure S1.** XRD spectra of 1 layer  $\text{Co}_3\text{O}_4$  (annealed at 500 °C) on  $\text{WO}_3$ . Only  $\text{WO}_3$  and FTO are detected, as the XRD is not sensitive enough to detect the ultra-thin  $\text{Co}_3\text{O}_4$  layer.

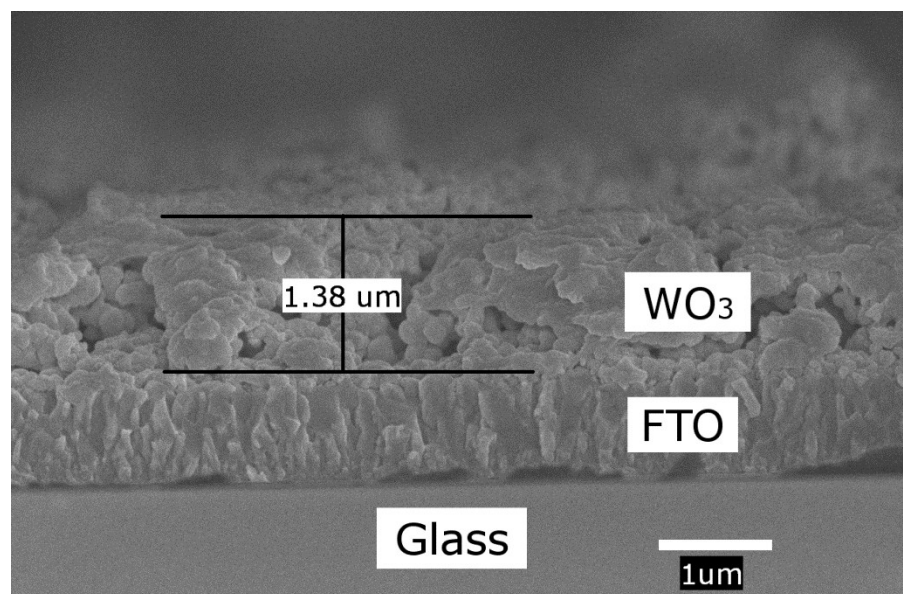

**Figure S2.** Cross-sectional view of  $\text{Co}_3\text{O}_4/\text{WO}_3$  film

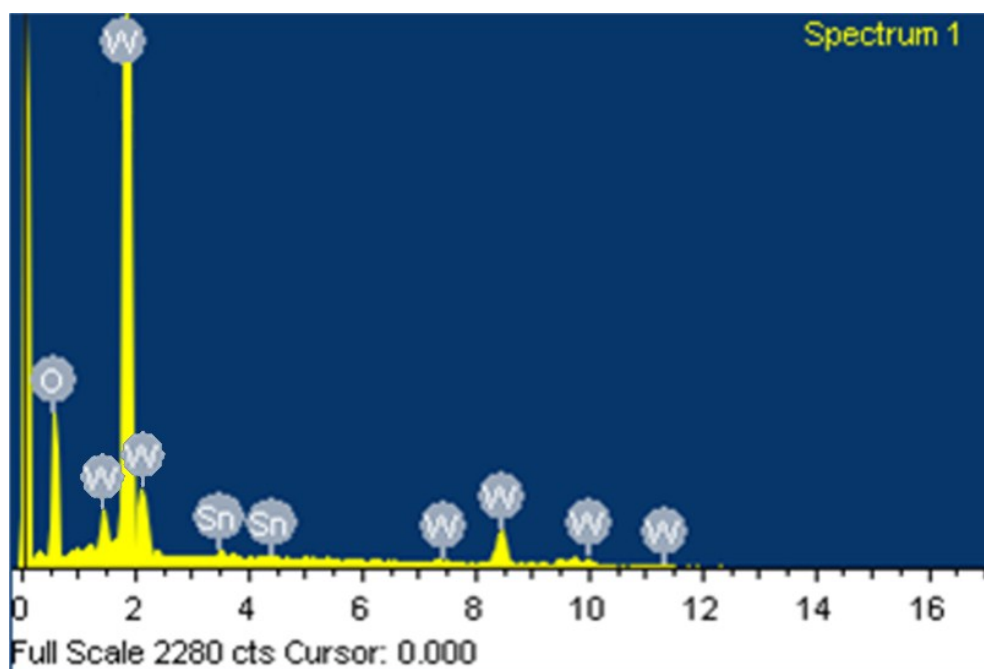

Figure S3. EDX analysis of  $\text{Co}_3\text{O}_4/\text{WO}_3$  film on FTO.

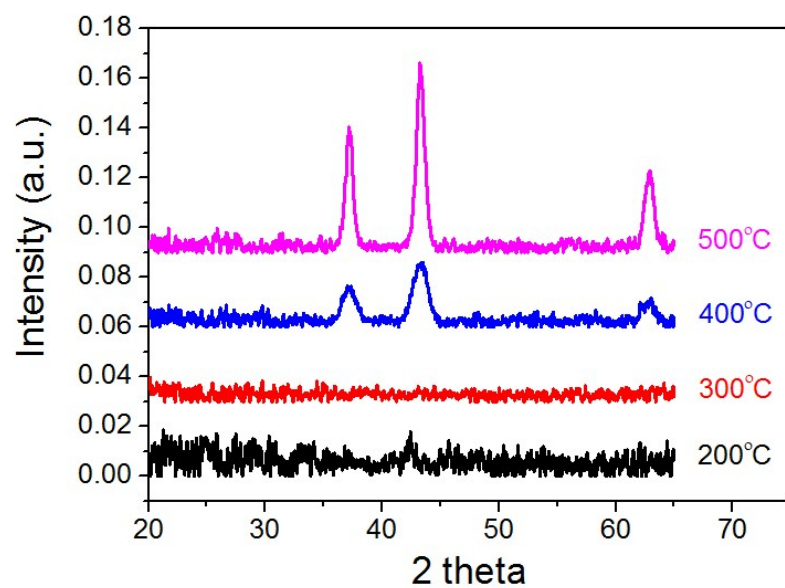

Figure S4. XRD spectra of  $\text{NiO}_x$  film on silicon at different annealing temperature.

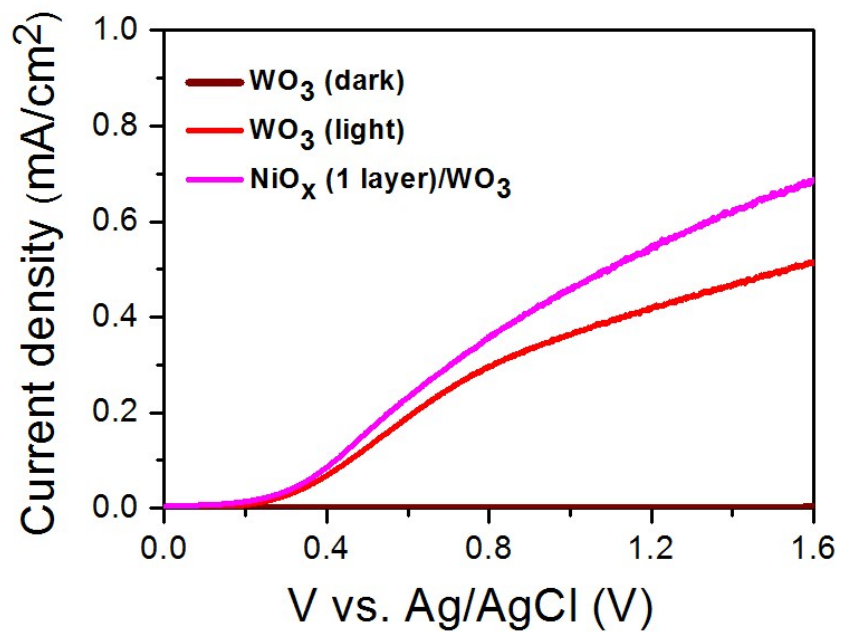

**Figure S5.** Photocurrent density of bare WO<sub>3</sub>, and NiO<sub>x</sub>/WO<sub>3</sub> (cocatalyst annealed at 350 °C).

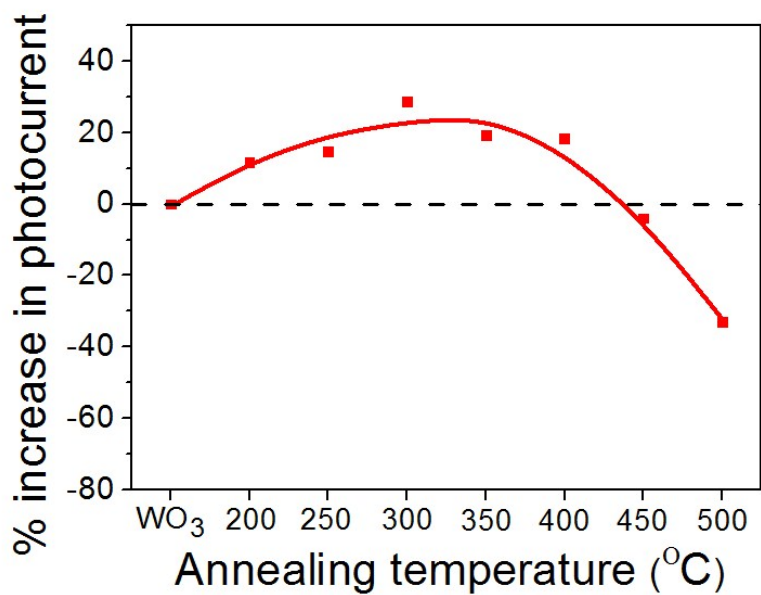

**Figure S6.** Percentage change in photocurrent (with respect to bare WO<sub>3</sub>) with cocatalyst annealing temperature for NiO<sub>x</sub>/WO<sub>3</sub> film at 1.2 V vs Ag/AgCl.
